# Supplementary material for: Exposure to biogenic phosphorus nano-agromaterials promotes early hatching and causes no acute toxicity in zebrafish embryos
Source: Royal Society of Chemistry journal article supplement (doi:10.1039/d1en00659b), 2022-01-01
Supplement: d1en00659b1.pdf [file d1en00659b1.pdf]

## Electronic Supplementary Information

### Exposure to biogenic phosphorus nano-agromaterials promotes early hatching and causes no acute toxicity in zebrafish embryos

Ayushi Priyam<sup>a,b</sup>, Pushplata Prasad Singh<sup>a,b</sup>, Luis O.B. Afonso<sup>a</sup>, Aaron G. Schultz<sup>a\*</sup>

<sup>a</sup> School of Life and Environmental Sciences, Deakin University, Geelong, Victoria, 3217,  
Australia.

<sup>b</sup> National Centre of Excellence for Advanced Research in Agricultural Nanotechnology,  
TERI - Deakin Nanobiotechnology Centre, Sustainable Agriculture Division, The Energy  
and Resources Institute (TERI), DS Block, India Habitat Centre, Lodhi Road, New Delhi,  
110003, India

\*Correspondence to [aaron.schultz@deakin.edu.au](mailto:aaron.schultz@deakin.edu.au)

**ESI Table 1.** Checklist for Minimum Information for Publication of Quantitative Real-Time PCR Experiments<sup>1</sup>

| ITEM TO CHECK                                                        | IMPORTANC<br>E | REPORTE<br>D |
|----------------------------------------------------------------------|----------------|--------------|
| <b>EXPERIMENTAL DESIGN</b>                                           |                |              |
| Definition of experimental and control groups                        | E              | YES          |
| Number within each group                                             | E              | YES          |
| Assay carried out by core lab or investigator's lab?                 | D              | YES          |
| Acknowledgement of authors' contributions                            | D              | YES          |
| <b>SAMPLE</b>                                                        |                |              |
| Description                                                          | E              | YES          |
| Volume/mass of sample processed                                      | D              | YES          |
| Microdissection or macrodissection                                   | E              | N/A          |
| Processing procedure                                                 | E              | YES          |
| If frozen - how and how quickly?                                     | E              | YES          |
| If fixed - with what, how quickly?                                   | E              | N/A          |
| Sample storage conditions and duration (especially for FFPE samples) | E              | YES          |
| <b>NUCLEIC ACID EXTRACTION</b>                                       |                |              |

|                                                           |     |     |
|-----------------------------------------------------------|-----|-----|
| Procedure and/or instrumentation                          | E   | YES |
| Name of kit and details of any modifications              | E   | YES |
| Source of additional reagents used                        | D   | N/A |
| Details of DNase or RNase treatment                       | E   | YES |
| Contamination assessment (DNA or RNA)                     | E   | YES |
| Nucleic acid quantification                               | E   | YES |
| Instrument and method                                     | E   | YES |
| Purity (A260/A280)                                        | D   | NO  |
| Yield                                                     | D   | NO  |
| RNA integrity method/instrument                           | E   | N/A |
| RIN/RQI or Cq of 3' and 5' transcripts                    | E   | N/A |
| Electrophoresis traces                                    | D   | NO  |
| Inhibition testing (Cq dilutions, spike or other)         | E   | YES |
| <b>REVERSE TRANSCRIPTION</b>                              |     |     |
| Complete reaction conditions                              | E   | YES |
| Amount of RNA and reaction volume                         | E   | YES |
| Priming oligonucleotide (if using GSP) and concentration  | E   | N/A |
| Reverse transcriptase and concentration                   | E   | YES |
| Temperature and time                                      | E   | YES |
| Manufacturer of reagents and catalogue numbers            | D   | YES |
| Cqs with and without RT                                   | D*  | N/A |
| Storage conditions of cDNA                                | D   | YES |
| <b>qPCR TARGET INFORMATION</b>                            |     |     |
| If multiplex, efficiency and LOD of each assay.           | E   | N/A |
| Sequence accession number                                 | E   | YES |
| Location of amplicon                                      | D   | NO  |
| Amplicon length                                           | E   | YES |
| <i>In silico</i> specificity screen (BLAST, etc)          | E   | YES |
| Pseudogenes, retropseudogenes or other homologs?          | D   | N/A |
| Sequence alignment                                        | D   | NO  |
| Secondary structure analysis of amplicon                  | D   | NO  |
| Location of each primer by exon or intron (if applicable) | E   | N/A |
| What splice variants are targeted?                        | E   | N/A |
| <b>qPCR OLIGONUCLEOTIDES</b>                              |     |     |
| Primer sequences                                          | E   | YES |
| RTPrimerDB Identification Number                          | D   | YES |
| Probe sequences                                           | D** | N/A |
| Location and identity of any modifications                | E   | N/A |
| Manufacturer of oligonucleotides                          | D   | YES |
| Purification method                                       | D   | YES |
| <b>qPCR PROTOCOL</b>                                      |     |     |

|                                                           |   |     |
|-----------------------------------------------------------|---|-----|
| Complete reaction conditions                              | E | YES |
| Reaction volume and amount of cDNA/DNA                    | E | YES |
| Primer, (probe), Mg <sup>++</sup> and dNTP concentrations | E | YES |
| Polymerase identity and concentration                     | E | YES |
| Buffer/kit identity and manufacturer                      | E | YES |
| Exact chemical constitution of the buffer                 | D | N/A |
| Additives (SYBR Green I, DMSO, etc.)                      | E | YES |
| Manufacturer of plates/tubes and catalog number           | D | YES |
| Complete thermocycling parameters                         | E | YES |
| Reaction setup (manual/robotic)                           | D | YES |
| Manufacturer of qPCR instrument                           | E | YES |
| <b>qPCR VALIDATION</b>                                    |   |     |
| Evidence of optimisation (from gradients)                 | D | NO  |
| Specificity (gel, sequence, melt, or digest)              | E | N/A |
| For SYBR Green I, C <sub>q</sub> of the NTC               | E | N/A |
| Standard curves with slope and y-intercept                | E | NO  |
| PCR efficiency calculated from slope                      | E | YES |
| Confidence interval for PCR efficiency or standard error  | D | NO  |
| r <sup>2</sup> of standard curve                          | E | YES |
| Linear dynamic range                                      | E | NO  |
| C <sub>q</sub> variation at lower limit                   | E | NO  |
| Confidence intervals throughout range                     | D | NO  |
| Evidence for limit of detection                           | E | NO  |
| If multiplex, efficiency and LOD of each assay.           | E | N/A |
| <b>DATA ANALYSIS</b>                                      |   |     |
| qPCR analysis program (source, version)                   | E | YES |
| C <sub>q</sub> method determination                       | E | YES |
| Outlier identification and disposition                    | E | N/A |
| Results of NTCs                                           | E | YES |
| Justification of number and choice of reference genes     | E | YES |
| Description of normalisation method                       | E | YES |
| Number and concordance of biological replicates           | D | YES |
| Number and stage (RT or qPCR) of technical replicates     | E | YES |
| Repeatability (intra-assay variation)                     | E | YES |
| Reproducibility (inter-assay variation, %CV)              | D | YES |
| Power analysis                                            | D | NO  |
| Statistical methods for result significance               | E | YES |
| Software (source, version)                                | E | YES |
| C <sub>q</sub> or raw data submission using RDML          | D | NO  |

E: essential information; D: desirable information; FFPE: formalin-fixed, paraffin-embedded; RIN: RNA integrity number; RQI: RNA quality indicator; GSP: gene-specific priming; dNTP: deoxynucleoside triphosphate; LOD: limit of detection. N/A: Not Applicable

**ESI Table 2.** Efficiency (E%) and R<sup>2</sup> values for the reference and target genes.

| <b>Genes</b>                                              | <b>Efficiency (E%)</b> | <b>R<sup>2</sup> values</b> |
|-----------------------------------------------------------|------------------------|-----------------------------|
| Reference gene: Beta actin ( <i>β-actin</i> )             | 94                     | 0.998                       |
| Reference gene: Elongation factor alpha ( <i>elf-1α</i> ) | 92.2                   | 0.994                       |
| Target gene: Activin type 2 receptor ( <i>acvr 2 α</i> )  | 96.3                   | 0.976                       |
| Target gene: Zebrafish hatching enzyme 1 ( <i>zhe1</i> )  | 102.9                  | 0.996                       |
| Target gene: Superoxide dismutase 1 ( <i>sod 1</i> )      | 96.3                   | 0.996                       |
| Target gene: Catalase ( <i>cat</i> )                      | 91.3                   | 0.999                       |

**ESI Table 3.** Reference gene stability using geNorm<sup>2</sup>, NormFinder<sup>3</sup>, and BestKeeper<sup>4</sup> algorithm

| <b>Gene stability by GeNorm at 48 hpf</b>                             |                           |               |
|-----------------------------------------------------------------------|---------------------------|---------------|
| Gene name                                                             | Stability value           |               |
| <b>β-actin   elf-1α</b>                                               | 0.46                      |               |
| <b>Gene stability by NormFinder t 48 hpf</b>                          |                           |               |
| Genes                                                                 | Geomean of ranking values |               |
| <b>β-actin</b>                                                        | 1.41                      |               |
| <b>elf-1α</b>                                                         | 1.19                      |               |
| <b>Pearson correlation coefficient ( r ) by BEST KEEPER at 48 hpf</b> |                           |               |
|                                                                       | <b>β-actin</b>            | <b>elf-1α</b> |
| n                                                                     | 72                        | 72            |
| geo Mean [CP]                                                         | 18.82                     | 19.04         |
| AR Mean [CP]                                                          | 18.82                     | 19.05         |
| min [CP]                                                              | 17.79                     | 18.18         |
| max [CP]                                                              | 20.24                     | 21.54         |
| std dev [+/- CP]                                                      | 0.48                      | 0.34          |
| CV [% CP]                                                             | 2.54                      | 1.77          |
| min [x-fold]                                                          | -2.04                     | -1.82         |
| max [x-fold]                                                          | 2.68                      | 5.65          |
| std dev [+/- x-fold]                                                  | 1.39                      | 1.26          |
| <b>Pearson correlation coefficient ( r ) by BEST KEEPER</b>           |                           |               |
|                                                                       | <b>β-actin</b>            | <b>elf-1α</b> |

|                                                        |                          |               |
|--------------------------------------------------------|--------------------------|---------------|
| Elf1a                                                  | 0.67                     | -             |
| p-value                                                | 0.001                    | -             |
| Pearson correlation coefficient ( r )                  |                          |               |
| BestKeeper vs.                                         | <b>β- actin</b>          | <b>elf-1α</b> |
| coeff. of corr. [r]                                    | 0.935                    | 0.89          |
| p-value                                                | 0.001                    | 0.001         |
| <b>Ranking Order (Better--Good--Average) at 48 hpf</b> |                          |               |
| Method                                                 | 1                        | 2             |
| <u>Delta CT</u>                                        | <b>elf-1α</b>            | β- actin      |
| <u>BestKeeper</u>                                      | <b>elf-1α</b>            | β- actin      |
| <u>Normfinder</u>                                      | <b>β- actin</b>          | elf-1α        |
| <u>Genorm</u>                                          | <b>β- actin   elf-1α</b> |               |
| <u>Recommended comprehensive ranking</u>               | <b>elf-1α</b>            | β- actin      |

|                                                                       |                           |               |
|-----------------------------------------------------------------------|---------------------------|---------------|
| <b>Gene stability by GeNorm at 96 hpf</b>                             |                           |               |
| Gene name                                                             | Stability value           |               |
| <b>β- actin   elf-1α</b>                                              | 0.224                     |               |
| <b>Gene stability by NormFinder at 96 hpf</b>                         |                           |               |
| Genes                                                                 | Geomean of ranking values |               |
| <b>β- actin</b>                                                       | 1.414                     |               |
| <b>elf-1α</b>                                                         | 1.189                     |               |
| <b>Pearson correlation coefficient ( r ) by BEST KEEPER at 96 hpf</b> |                           |               |
|                                                                       | <b>β- actin</b>           | <b>elf-1α</b> |
| n                                                                     | 72                        | 72            |
| geo Mean [CP]                                                         | 18.36                     | 19.33         |
| AR Mean [CP]                                                          | 18.36                     | 19.33         |
| min [CP]                                                              | 17.44                     | 18.53         |
| max [CP]                                                              | 19.25                     | 20.21         |
| std dev [+/- CP]                                                      | 0.37                      | 0.28          |
| CV [% CP]                                                             | 2.01                      | 1.46          |
| min [x-fold]                                                          | -1.89                     | -1.74         |
| max [x-fold]                                                          | 1.86                      | 1.84          |
| std dev [+/- x-fold]                                                  | 1.29                      | 1.22          |
| <b>Pearson correlation coefficient ( r ) by BEST KEEPER</b>           |                           |               |
|                                                                       | <b>β- actin</b>           | <b>elf-1α</b> |
| Elf1a                                                                 | 0.886                     | -             |
| p-value                                                               | 0.001                     | -             |
| Pearson correlation coefficient ( r )                                 |                           |               |
| BestKeeper vs.                                                        | <b>β- actin</b>           | <b>elf-1α</b> |
| coeff. of corr. [r]                                                   | 0.98                      | 0.961         |

|                                                        |                                                             |                 |
|--------------------------------------------------------|-------------------------------------------------------------|-----------------|
| p-value                                                | 0.001                                                       | 0.001           |
| <b>Ranking Order (Better--Good--Average) at 96 hpf</b> |                                                             |                 |
| Method                                                 | 1                                                           | 2               |
| <u>Delta CT</u>                                        | <b>elf-1<math>\alpha</math></b>                             | $\beta$ - actin |
| <u>BestKeeper</u>                                      | <b>elf-1<math>\alpha</math></b>                             | $\beta$ - actin |
| <u>Normfinder</u>                                      | <b><math>\beta</math>- actin</b>                            | elf-1 $\alpha$  |
| <u>Genorm</u>                                          | <b><math>\beta</math>- actin   elf-1<math>\alpha</math></b> |                 |
| <u>Recommended comprehensive ranking</u>               | <b>elf-1<math>\alpha</math></b>                             | $\beta$ - actin |

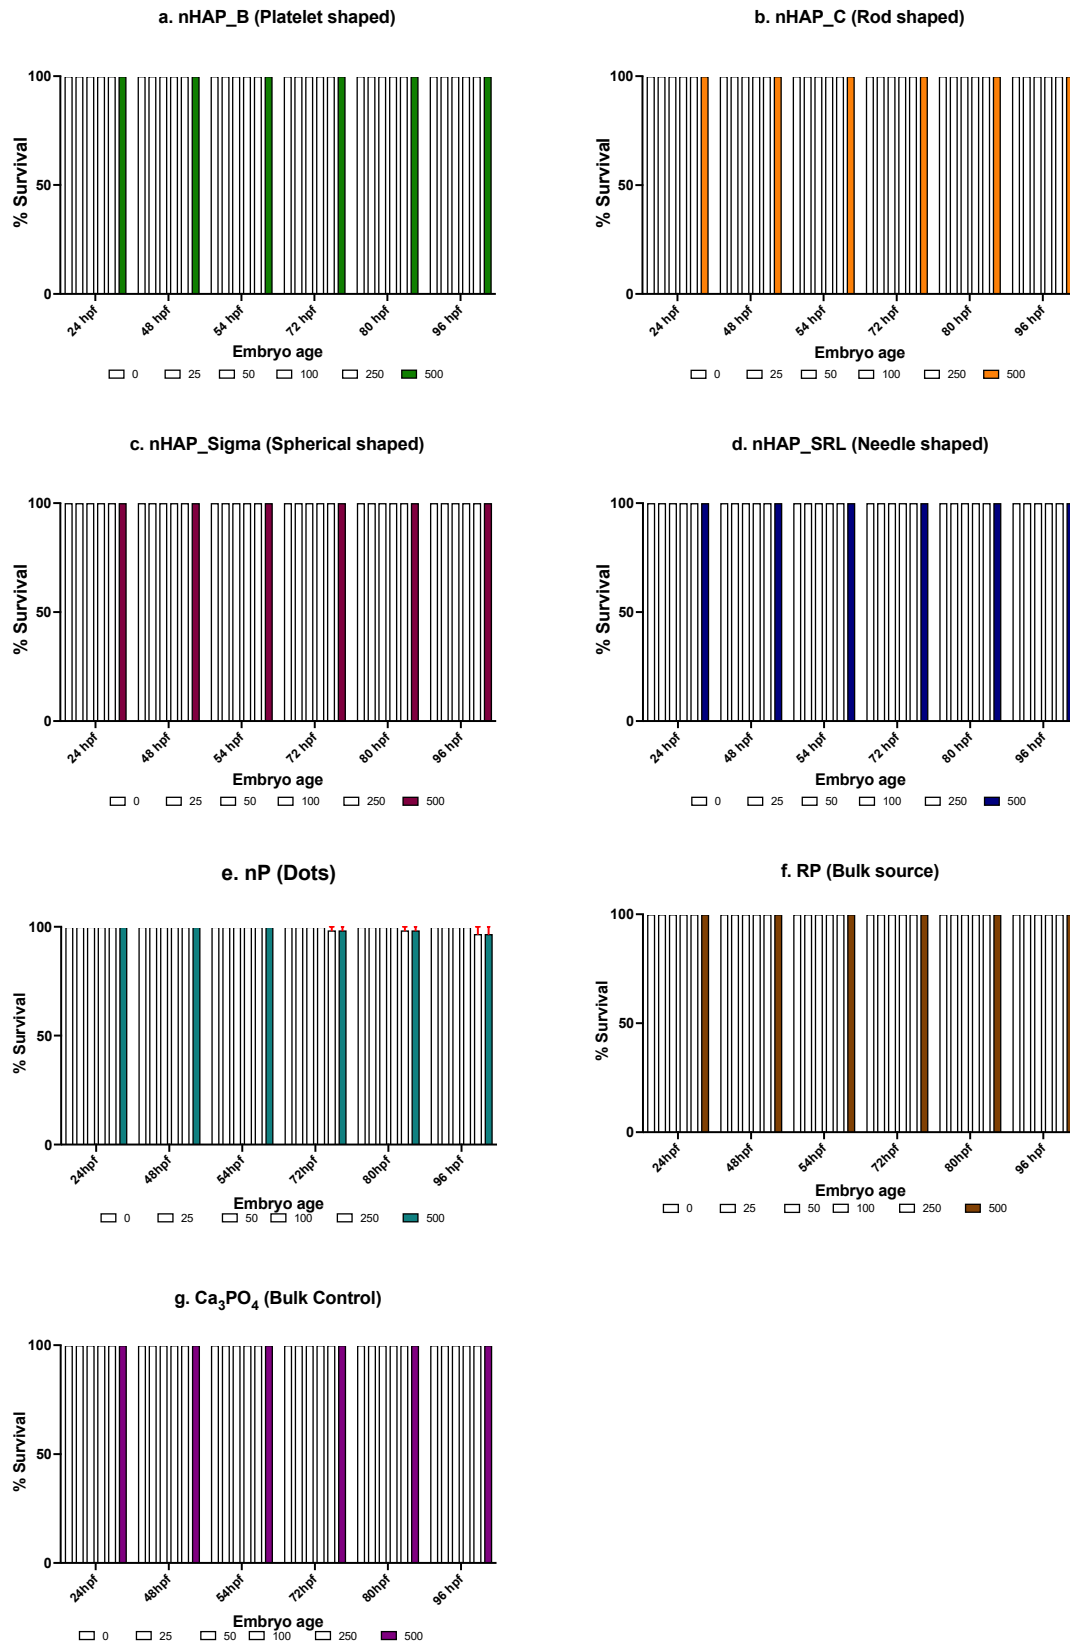

**ESI Fig. 1.** Effect of a. biologically synthesized nHAP (nHAP\_B), b. chemically synthesized nHAP (nHAP\_C), c. Sigma Aldrich nHAP (nHAP\_Sigma), d. SRL nHAP (nHAP\_SRL), e. nanophosphorous (nP), f. rock phosphate bulk control (RP), and g. calcium phosphate bulk control (Ca<sub>3</sub>PO<sub>4</sub>) at increasing concentrations (0, 25, 50, 100, 250 and 500 µg.mL<sup>-1</sup>) on survival of zebrafish embryos at after 96 hpf. Values reported as mean ± S.E.M.

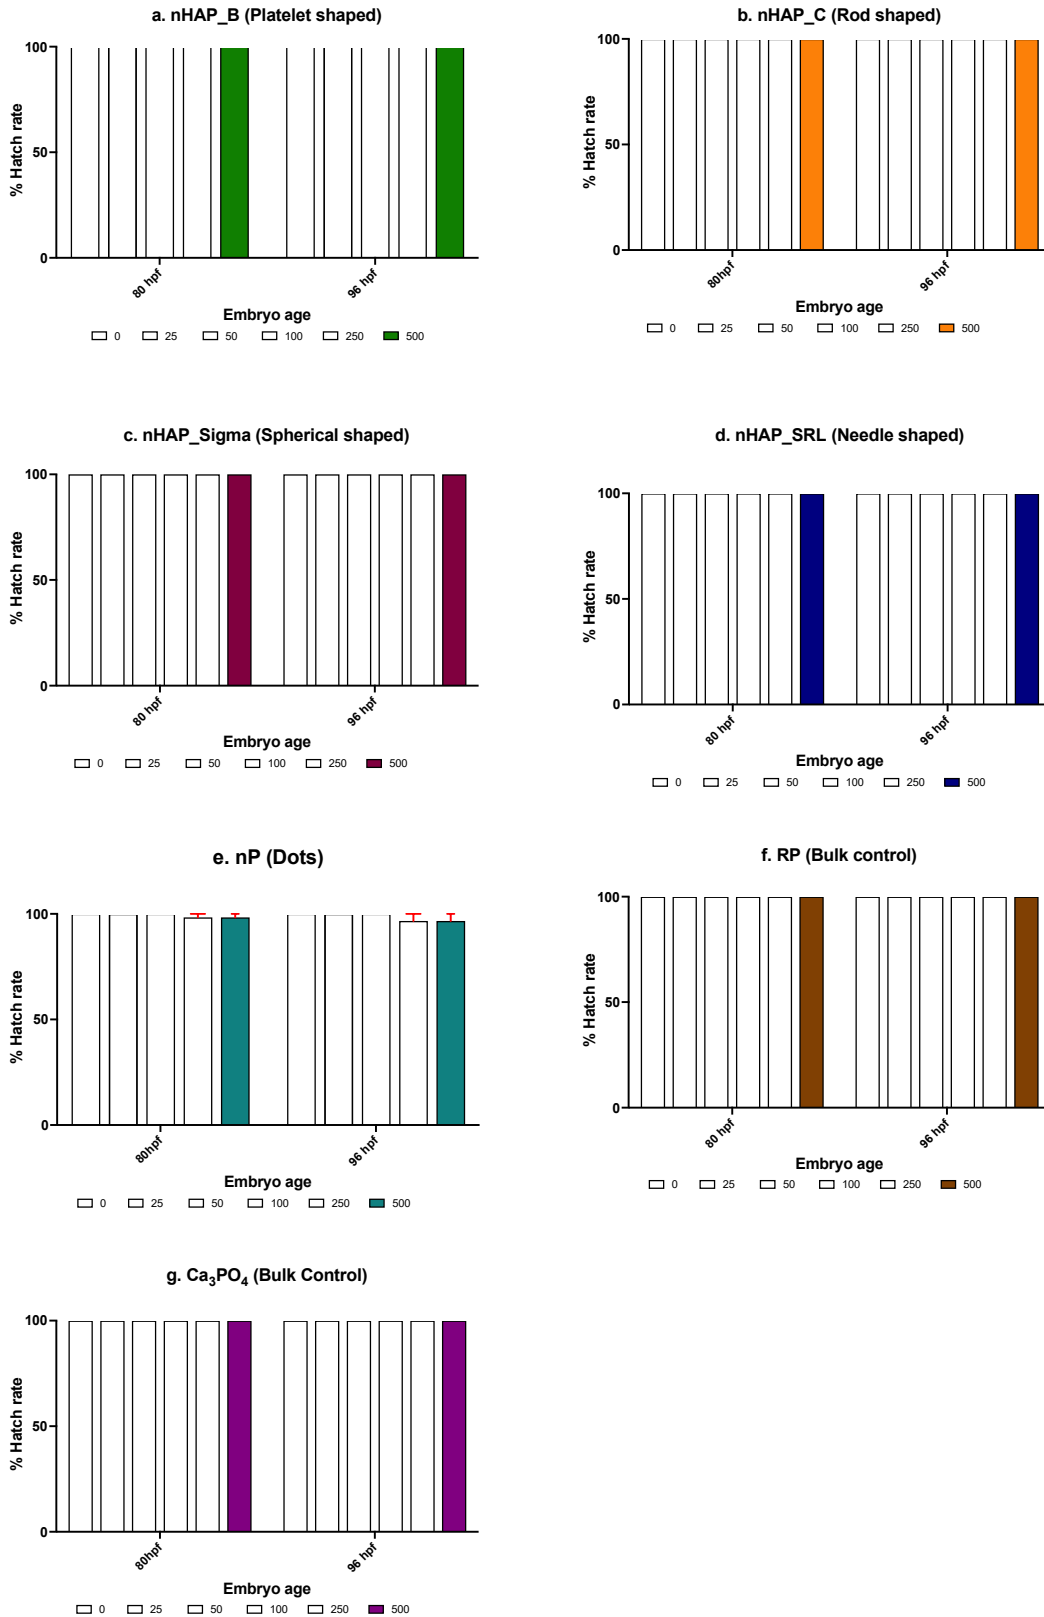

**ESI Fig. 2.** Effect of a. biologically synthesized nHAP (nHAP\_B), b. chemically synthesized nHAP (nHAP\_C), c. Sigma Aldrich nHAP (nHAP\_Sigma), d. SRL nHAP (nHAP\_SRL), e. nanophosphorus (nP), f. rock phosphate bulk control (RP), and g. calcium phosphate bulk control (Ca<sub>3</sub>PO<sub>4</sub>) at increasing concentrations (0, 25, 50, 100, 250 and 500 µg.mL<sup>-1</sup>) on hatch rate of zebrafish embryos at 80 and 96 hpf. Values reported as mean ± S.E.M.



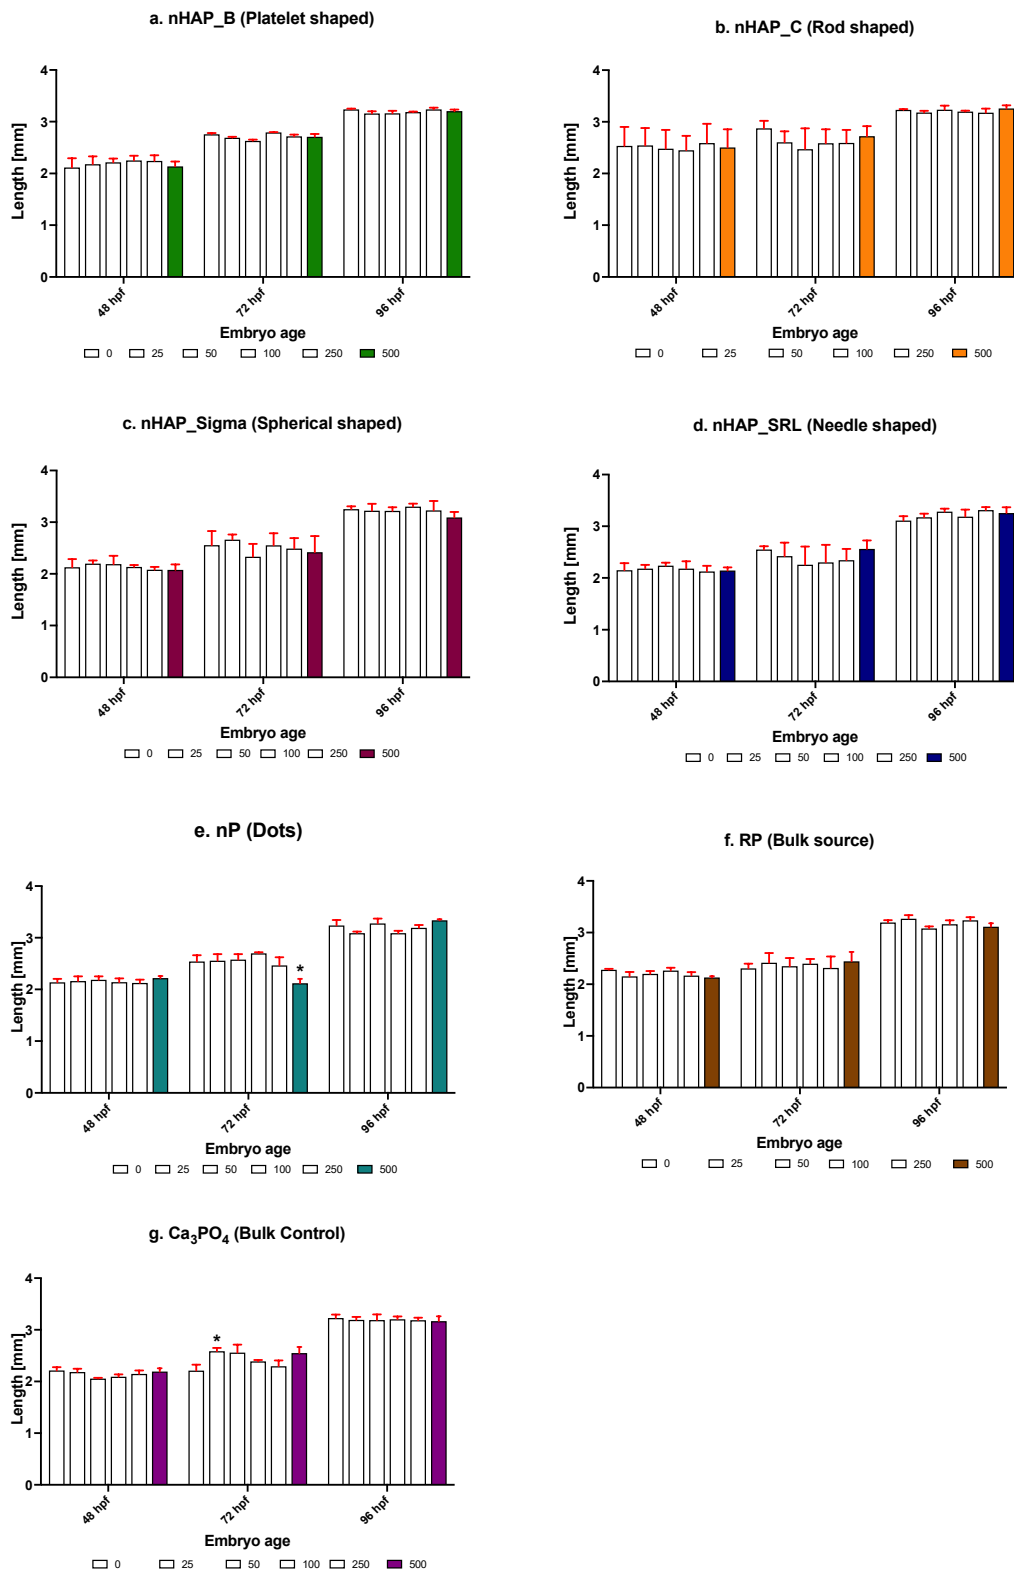

**ESI Fig. 3.** Effect of a. biologically synthesized nHAP (nHAP\_B), b. chemically synthesized nHAP (nHAP\_C), c. Sigma Aldrich nHAP (nHAP\_Sigma), d. SRL nHAP (nHAP\_SRL), e. nanophosphorus (nP), f. rock phosphate bulk control (RP), and g. calcium phosphate bulk control (Ca<sub>3</sub>PO<sub>4</sub>) at increasing concentrations (0, 25, 50, 100, 250 and 500 µg.mL<sup>-1</sup>) on embryo length of zebrafish embryos at 48, 72 and 96 hpf. Values reported as mean ± S.E.M.

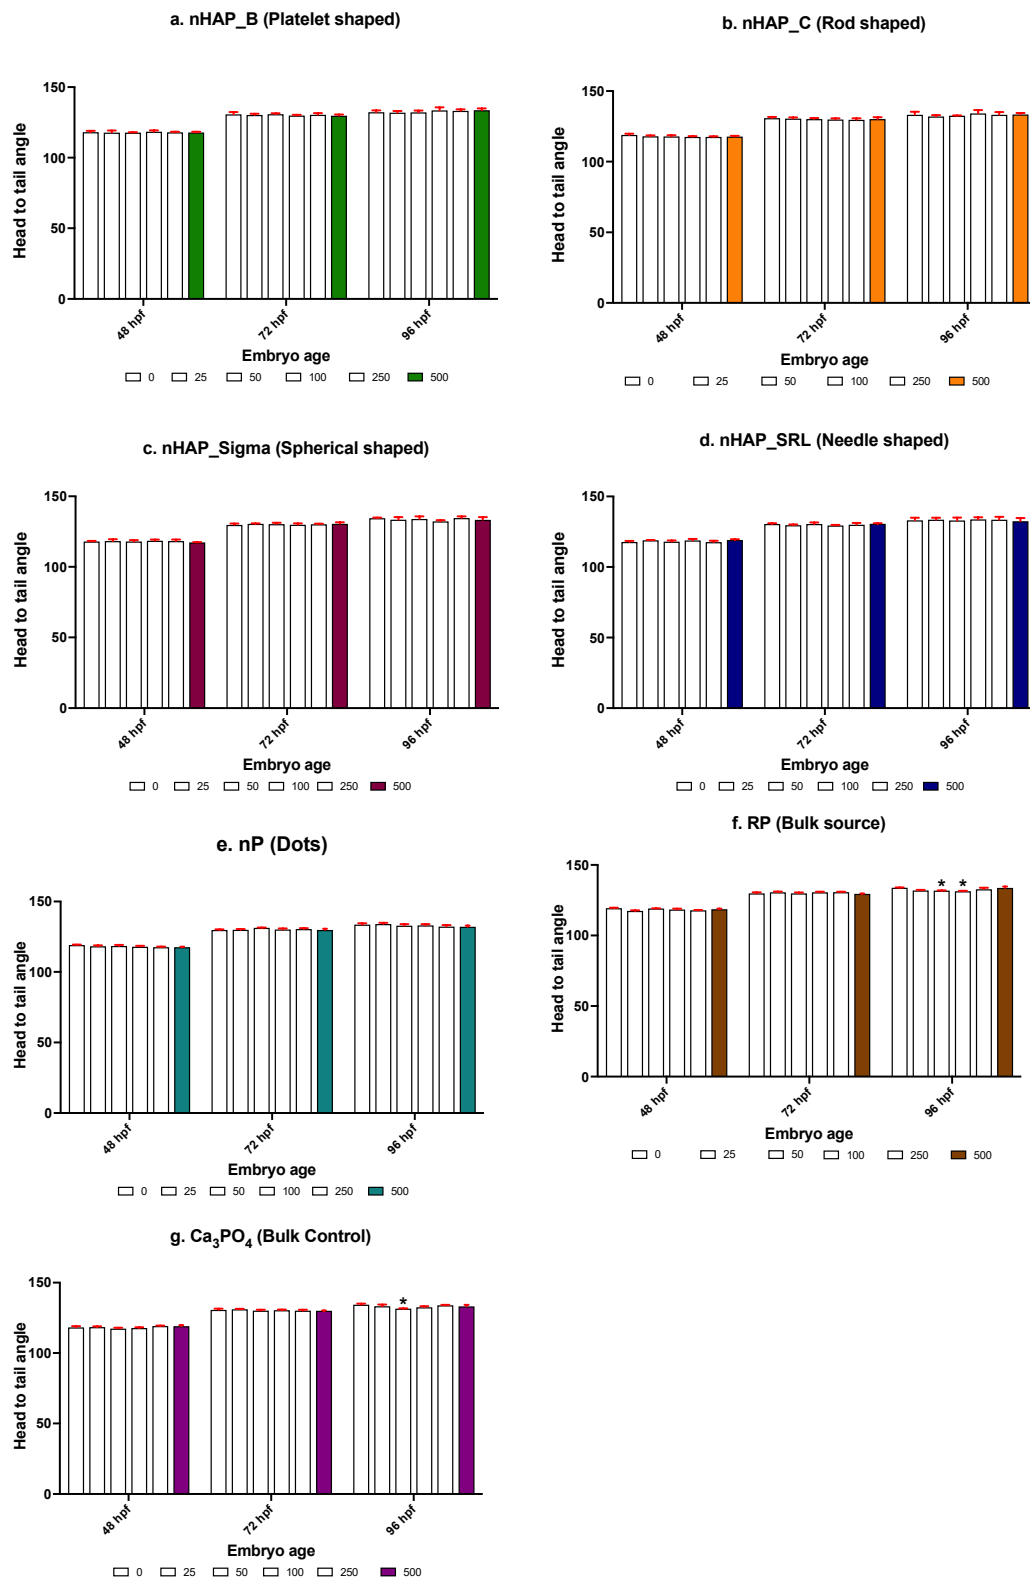

**ESI Fig. 4.** Effect of a. biologically synthesized nHAP (nHAP\_B), b. chemically synthesized nHAP (nHAP\_C), c. Sigma Aldrich nHAP (nHAP\_Sigma), d. SRL nHAP (nHAP\_SRL), e. nanophosphorus (nP), f. rock phosphate bulk control (RP), and g. calcium phosphate bulk control (Ca<sub>3</sub>PO<sub>4</sub>) at increasing concentrations (0, 25, 50, 100, 250 and 500 µg.mL<sup>-1</sup>) on head to tail angle of zebrafish embryos at 48, 72 and 96 hpf. Values reported as mean ± S.E.M.

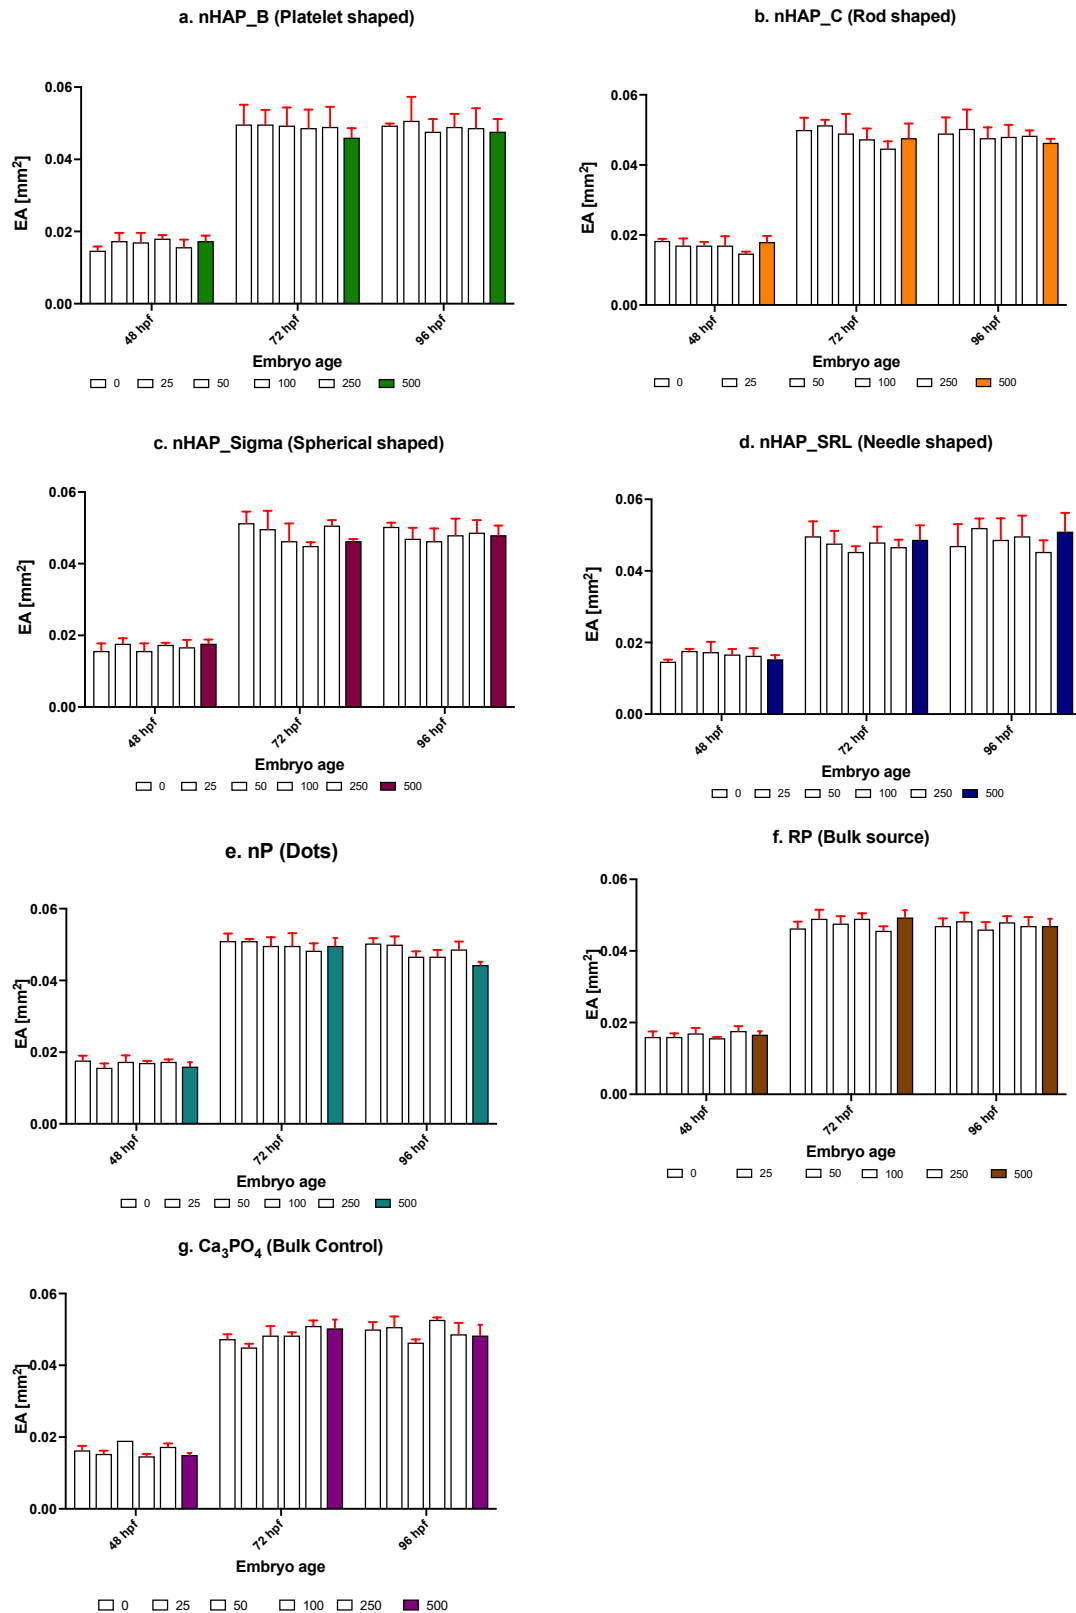

**ESI Fig. 5.** Effect of a. biologically synthesized nHAP (nHAP\_B), b. chemically synthesized nHAP (nHAP\_C), c. Sigma Aldrich nHAP (nHAP\_Sigma), d. SRL nHAP (nHAP\_SRL), e. nanophosphorus (nP), f. rock phosphate bulk control (RP), and g. calcium phosphate bulk control (Ca<sub>3</sub>PO<sub>4</sub>) at increasing concentrations (0, 25, 50, 100, 250 and 500 µg.mL<sup>-1</sup>) on eye area of zebrafish embryos at 48, 72 and 96 hpf. Values reported as mean ± S.E.M.

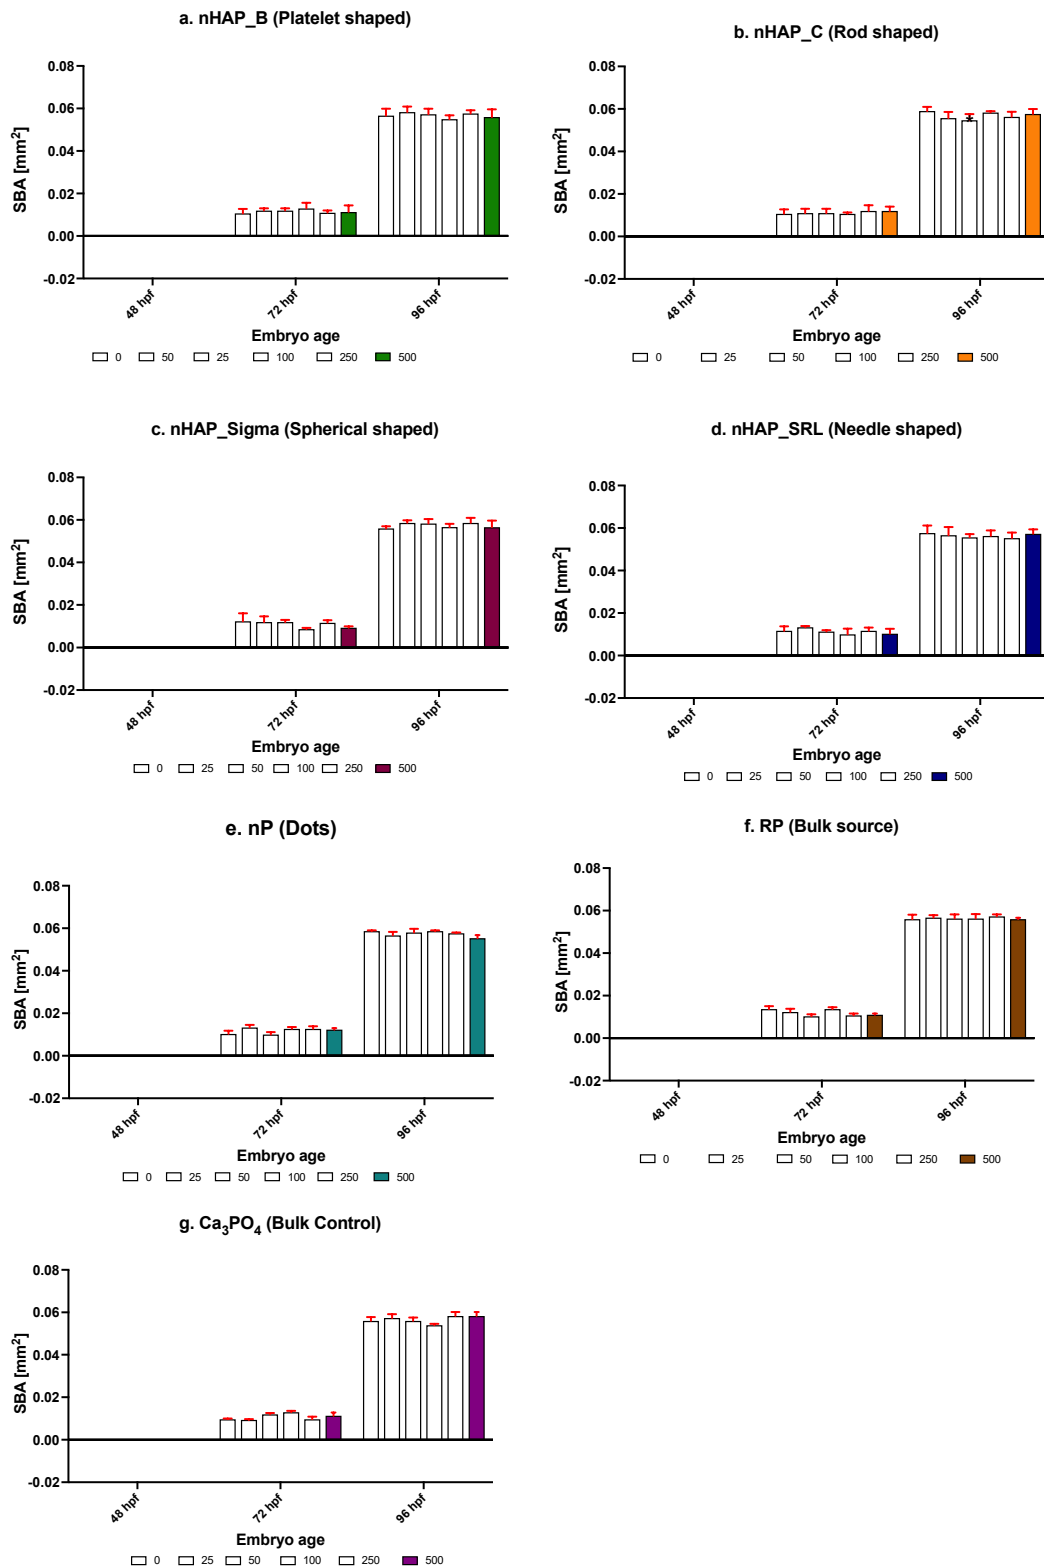

**ESI Fig. 6.** Effect of a. biologically synthesized nHAP (nHAP\_B), b. chemically synthesized nHAP (nHAP\_C), c. Sigma Aldrich nHAP (nHAP\_Sigma), d. SRL nHAP (nHAP\_SRL), e. nanophosphorus (nP), f. rock phosphate bulk control (RP), and g. calcium phosphate bulk control (Ca<sub>3</sub>PO<sub>4</sub>) at increasing concentrations (0, 25, 50, 100, 250 and 500 µg.mL<sup>-1</sup>) on swim bladder area of zebrafish embryos at 48, 72 and 96 hpf. Values reported as mean ± S.E.M.

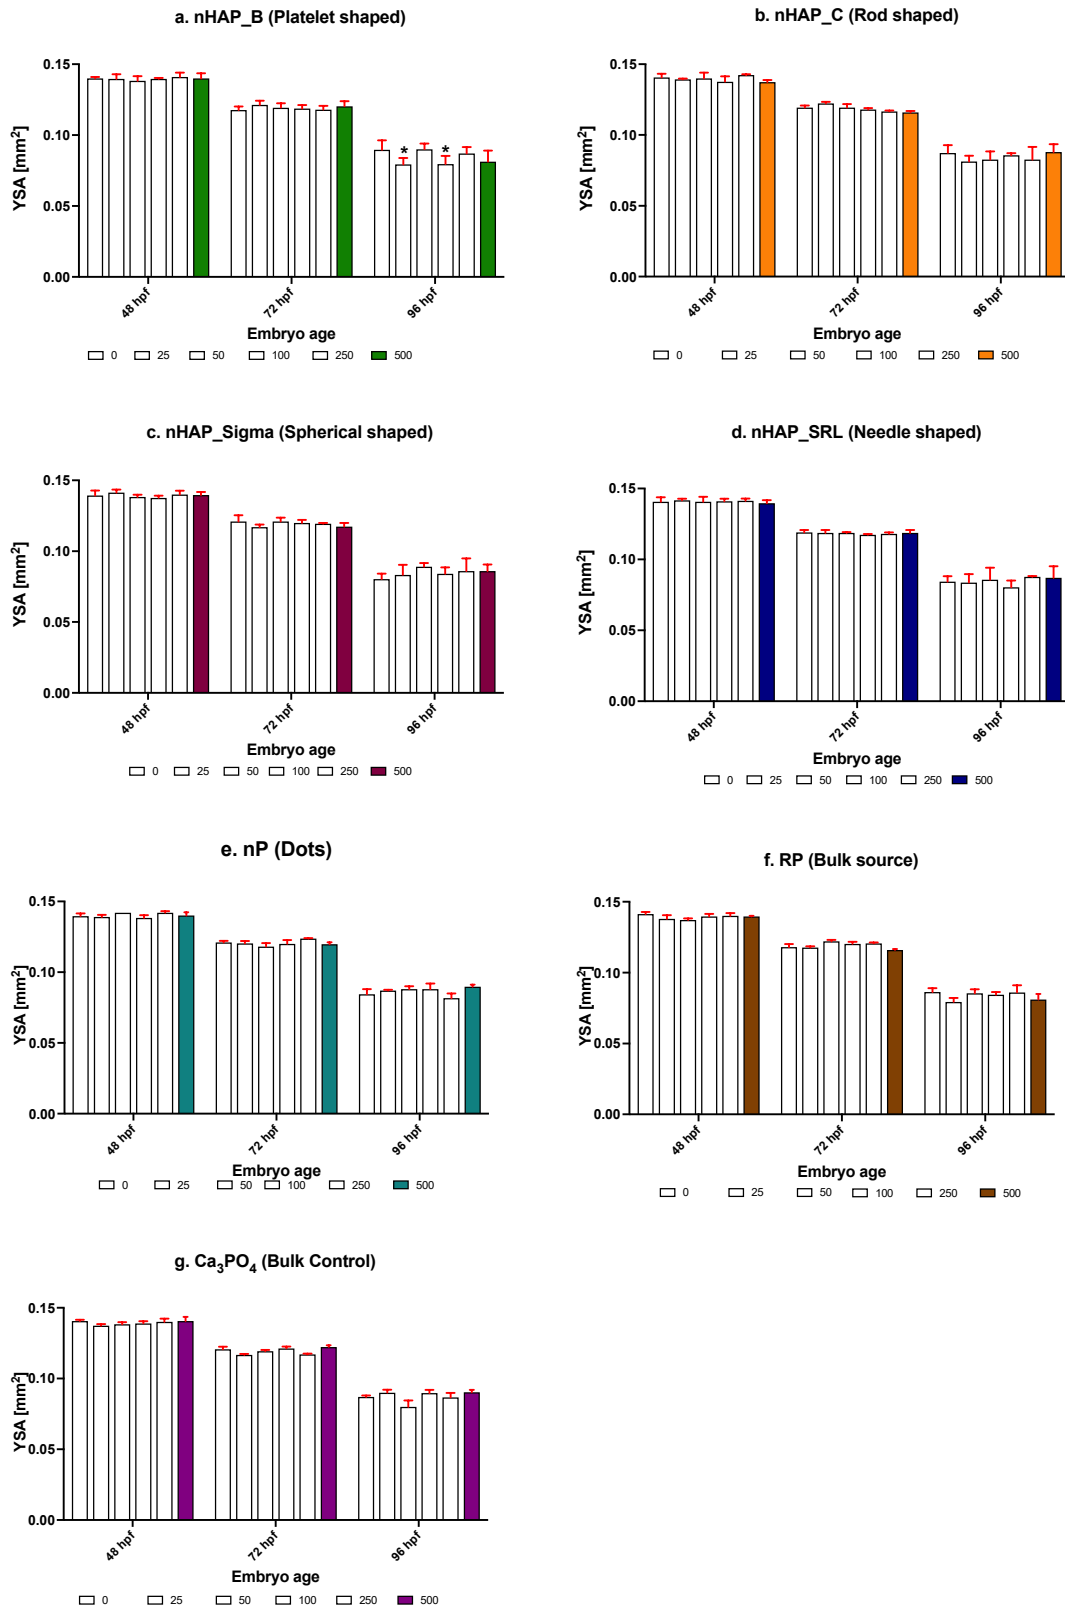

**ESI Fig. 7.** Effect of a. biologically synthesized nHAP (nHAP\_B), b. chemically synthesized nHAP (nHAP\_C), c. Sigma Aldrich nHAP (nHAP\_Sigma), d. SRL nHAP (nHAP\_SRL), e. nanophosphorus (nP), f. rock phosphate bulk control (RP), and g. calcium phosphate bulk control (Ca<sub>3</sub>PO<sub>4</sub>) at increasing concentrations (0, 25, 50, 100, 250 and 500 µg.mL<sup>-1</sup>) on

yolk sac area of zebrafish embryos at 48, 72 and 96 hpf. Values reported as mean  $\pm$  S.E.M.

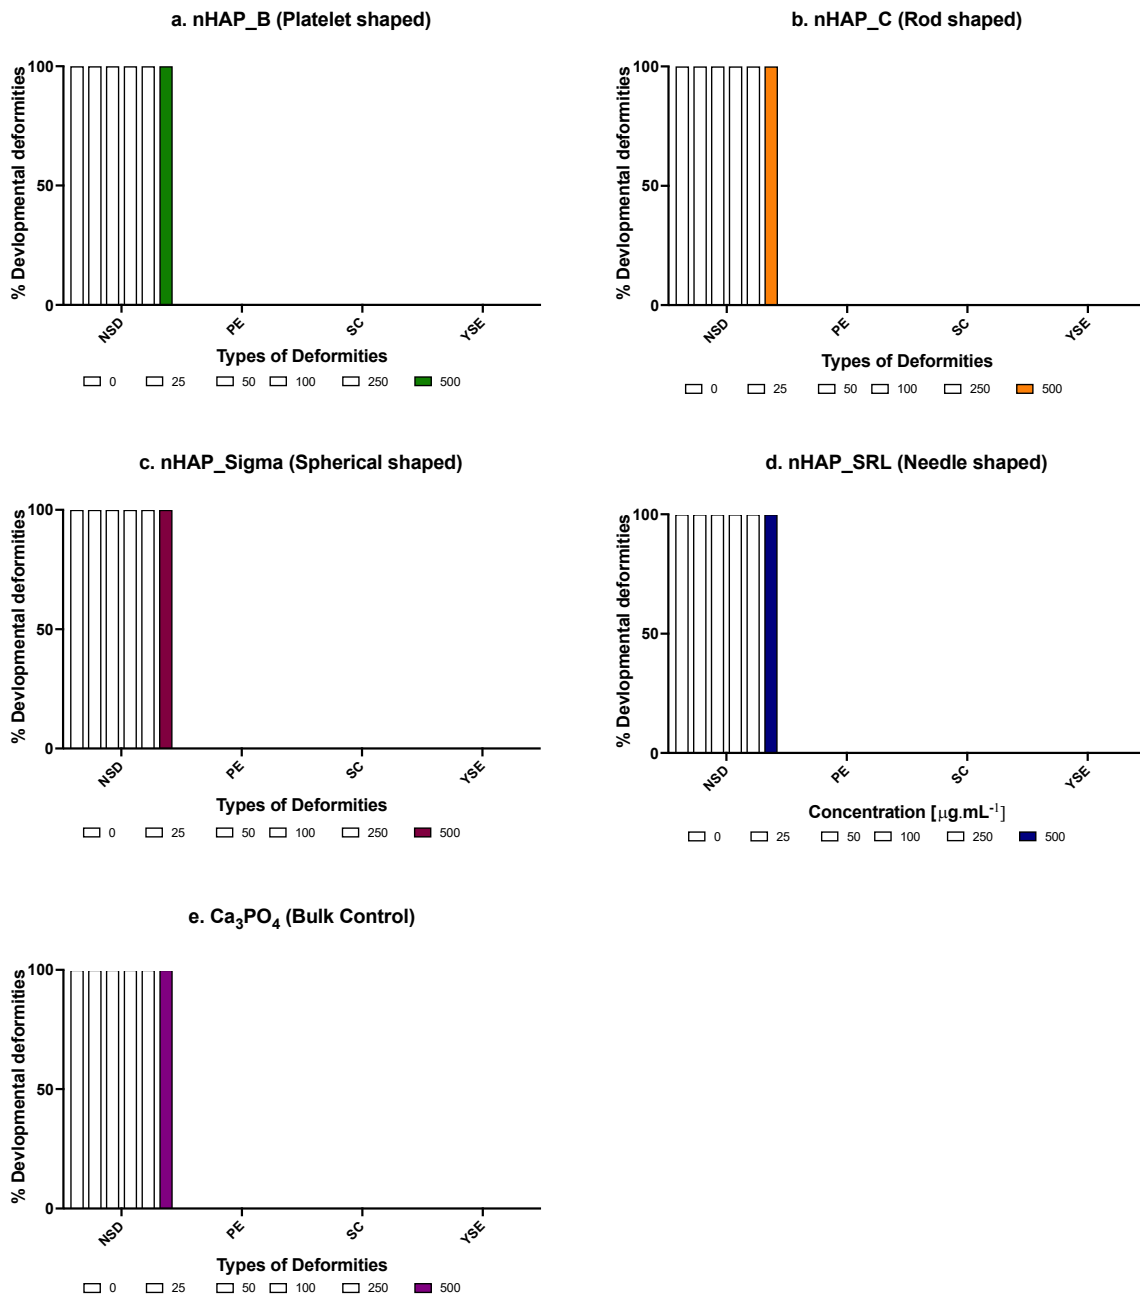

**ESI Fig. 8.** No structural deformities (NSD) in zebrafish embryos after exposure to a. biologically synthesized nHAP (nHAP\_B), b. chemically synthesized nHAP (nHAP\_C), c. Sigma Aldrich nHAP (nHAP\_Sigma), d. SRL nHAP (nHAP\_SRL), and e. calcium phosphate bulk control (Ca<sub>3</sub>PO<sub>4</sub>) at increasing concentrations (0, 25, 50, 100, 250 and 500  $\mu\text{g.mL}^{-1}$ ) at 72 hpf. PE: pericardial edema, SC: spinal curvature, YSE: Yolk sac edema.

## References:

1. Bustin, S. A.; Benes, V.; Garson, J. A.; Hellemans, J.; Huggett, J.; Kubista, M.; Mueller, R.; Nolan, T.; Pfaffl, M. W.; Shipley, G. L., The MIQE Guidelines: Minimum Information for Publication of Quantitative Real-Time PCR Experiments. Oxford University Press: 2009.
2. Vandesompele, J.; De Preter, K.; Pattyn, F.; Poppe, B.; Van Roy, N.; De Paepe, A.; Speleman, F., Accurate normalization of real-time quantitative RT-PCR data by geometric averaging of multiple internal control genes. *Genome biology* **2002**, *3* (7), 1-12.
3. Andersen, C. L.; Jensen, J. L.; Ørntoft, T. F., Normalization of real-time quantitative reverse transcription-PCR data: a model-based variance estimation approach to identify genes suited for normalization, applied to bladder and colon cancer data sets. *Cancer research* **2004**, *64* (15), 5245-5250.
4. Pfaffl, M. W.; Tichopad, A.; Prgomet, C.; Neuvians, T. P., Determination of stable housekeeping genes, differentially regulated target genes and sample integrity: BestKeeper–Excel-based tool using pair-wise correlations. *Biotechnology letters* **2004**, *26* (6), 509-515.
